# Supplementary material for: Cerebrospinal fluid microRNAs are potential biomarkers of temporal lobe epilepsy and status epilepticus
Source: Springer Nature journal article supplement (doi:10.1038/s41598-017-02969-6), 2017-06-06
Supplement: MOESM1 [file 41598_2017_2969_MOESM1_ESM.pdf]

## Supplementary Information

### Cerebrospinal fluid microRNAs are potential biomarkers of temporal lobe epilepsy and status epilepticus

Rana Raoof, Eva M. Jimenez-Mateos, Sebastian Bauer, Björn Tackenberg, Felix Rosenow, Johannes Lang, Müjgan Dogan Onugoren, Hajo Hamer, Tessa Huchtemann, Peter Körtvélyessy, Niamh M. C. Connolly, Shona Pfeiffer, Jochen H.M. Prehn, Michael A. Farrell, Donncha F. O'Brien, David C. Henshall and Catherine Mooney

## Supplementary Materials and Methods

### RNA extraction

Total RNA was extracted from 200  $\mu$ l of CSF or plasma using miRCURY™ RNA Isolation Kit (Exiqon) according to the manufacturer protocol. Lysis of membranized particles within the sample were performed using lysis solution. After a protein precipitation step the resultant supernatant was collected and mixed with isopropanol then loaded into a spin-column which binds only the RNA. This was followed by two respective wash steps followed by a centrifugation for 2 minutes at 11,000 x g to dry the column membrane completely. The final purified RNA was eluted in 25  $\mu$ l RNAase free water. Small RNA and microRNA concentration and microRNA % in each sample was assessed using a fragment analyzer (Advanced Analytical).

### MicroRNA expression profiling

MicroRNA profiling was performed using the OpenArray platform from Applied Biosystem, as described (Mooney *et al.*, 2015). The OpenArray reverse transcription reaction was performed according to the manufacturer's protocol using 3  $\mu$ l of total RNA in a mix of 0.75  $\mu$ l Megaplex RT primer pools (human Pools A or B Cat No. 4444750) from Applied Biosystem, 1.5  $\mu$ M dNTPs with dTTPs, 75U Multiscribe Reverse Transcriptase, 1X RT Buffer, 1.5  $\mu$ M MgCl<sub>2</sub>, 1.8U RNAase inhibitor (RT kit Cat No 4366596, AB). Reverse transcription reaction was performed in Applied Biosystem thermal cycler.

To increase the quantity of desired cDNA before performing PCR and to significantly increase the ability to detect low abundance transcripts, a pre-amplification step was performed according to the manufacturer's recommendation. 2.5  $\mu$ l RT product was mixed with 1X Megaplex PreAmp primers (10X Human Pool A and B Cat. No. 4444748, AB), 1X TaqMan PreAmp master mix (2X, Cat No. 4391128, AB). Pre-amplification reaction was performed in an Applied Biosystem thermal cycler.

PreAmp product was first diluted with 0.1X TE to a ratio of 1:40, 22.5  $\mu$ l of diluted PreAmp product was then added to same volume of 2X TaqMan OpenArray Real time PCR Master Mix (Cat No. 4462164, AB) in the 384-well OpenArray sample loading plate. The manufacturers protocol was followed and the OpenArray panels were automatically loaded by the OpenArray AccuFill System. Each panel enables the quantification of microRNA expression in three samples and up to four panels can be cycled simultaneously, allowing for the analysis of 12 samples on a QuantStudio 12K Flex Real-Time PCR system. 754 human microRNAs were amplified in each sample together with 16 replicates each of four internal controls (ath-miR159a, RNU48, RNU44 and U6 rRNA).

### Reverse Transcription and Real-Time PCR validation

Validation of OpenArray findings was performed using the small-scale RT-qPCR protocol adapted from (Mitchell *et al.*, 2008). RNA was extracted from CSF samples using miRCURY RNA isolation kit-biofluid. For the Reverse Transcription step, a master mix containing, 1x RT buffer (AB), 1.26 units RNAase inhibitor (AB), 16.5 units Multiscribe reverse transcriptase enzyme (AB), 0.025 mM dNTPs (AB), 0.6  $\mu$ l of the specific stem loop RT primer for each microRNA was prepared and added to 1.7  $\mu$ l of total RNA (similar to Mitchell *et al.* (2008)). For real-time PCR amplification, cDNA was diluted in a ratio of 1:6.5 and assayed using 1X TaqMan Fast Universal PCR Master Mix (AB) and microRNA-specific PCR primers. The amplification was done in triplicate and a negative control was included for each primer. The same protocol was followed to quantify the microRNA levels of miR-19b-3p, miR-21-5p and miR-451a in plasma samples from TLE patients.

### **Analysis of microRNA content within exosomes and complexed to Argonaute2**

To indicate whether significantly differentially expressed microRNAs are protein bound (Argonaute2) or enclosed within exosomes, we pooled the CSF samples into five TLE samples, five SE samples, three multiple sclerosis samples and three Alzheimer's disease samples. Each pool was then divided into three parts: 300  $\mu\text{l}$  was allocated for exosome precipitation; 300  $\mu\text{l}$  for Argonaute2 immunoprecipitation; and 200  $\mu\text{l}$  for total RNA extraction.

Exosome precipitation was performed using the ExoQuick<sup>TM</sup> Exosome Precipitation Solution (System Biosciences-SBI) (Lobb *et al.*, 2015). Briefly, 75.6  $\mu\text{l}$  of precipitation solution was added to 300  $\mu\text{l}$  of CSF. The mix was incubated for 24 hours at 4°C, followed by centrifugation at 1500 x g for 30 minutes. After centrifugation the exosomes appear as a white pellet at the bottom of the tube. To remove any excess precipitation solution a second quick centrifugation step at 1500 x g for 5 minutes was performed. Total RNA was then extracted from exosomes using miRCURY RNA isolation kit-biofluid according to manufacturer protocol.

Argonaute2 pull-down from CSF was adapted from (Jimenez-Mateos *et al.*, 2012) as follows. 300  $\mu\text{l}$  of pooled CSF was incubated overnight with 10  $\mu\text{g}$  of antibodies against Argonaute-2 (C34C6, Cell Signaling Technology) at 4°C. Protein A-agarose beads (Santa Cruz Biotechnology) were added, mixed and incubated for 4 hours at 4°C, then centrifuged and the supernatant removed. The pellet was washed three times with immunoprecipitation buffer containing 300 mM NaCl, 5 mM MgCl<sub>2</sub>, 0.1% NP-40, 50 mM Tris HCl. Total RNA was extracted from Argonaute2 IP pellet using 200  $\mu\text{l}$  of Trizol reagent (Invitrogen). Phase separation was performed using 50  $\mu\text{l}$  of chloroform, the upper aqueous phase was collected and transformed into a new tube.

Total RNA in the sample was precipitated and washed using Isopropanol and 75% ethanol respectively. The final RNA pellet was dissolved in 12  $\mu\text{l}$  RNAase free water.

### **MicroRNA expression after exosome precipitation and Argonaute2 IP**

For the reverse transcription reaction, RT primers for miR-19b-3p, miR-21-5p and miR-451a were pooled and diluted with 1X TE buffer to a final concentration of 0.05X. An RT mix was prepared containing 3  $\mu\text{l}$  Multiscribe reverse transcriptase enzyme, 1.5  $\mu\text{l}$  10X RT buffer, 0.19  $\mu\text{l}$  RNAase inhibitor, 0.3  $\mu\text{l}$  dNTPs, 6  $\mu\text{l}$  RT primer pool and 1.01  $\mu\text{l}$  dH<sub>2</sub>O. For a 15  $\mu\text{l}$  RT reaction, 3  $\mu\text{l}$  RNA was mixed with 12  $\mu\text{l}$  RT mix.

To increase the quantity of desired cDNA before performing PCR, a pre-amplification step was performed for each sample. Pre-amplification reaction mix was prepared by pooling the TaqMan microRNA assays of the above microRNAs and diluting it with 1X TE buffer to a final concentration of 0.2X. 3.75  $\mu\text{l}$  of preamp primer pool was added to 2.5  $\mu\text{l}$  RT product and 12.5  $\mu\text{l}$  of 2X TaqMan preamp master mix, dH<sub>2</sub>O was added so the final volume of the reaction is 25  $\mu\text{l}$ . RT-qPCR was then performed in 96 well plate following the same protocol described earlier.

## Supplementary Figures S1 - 6

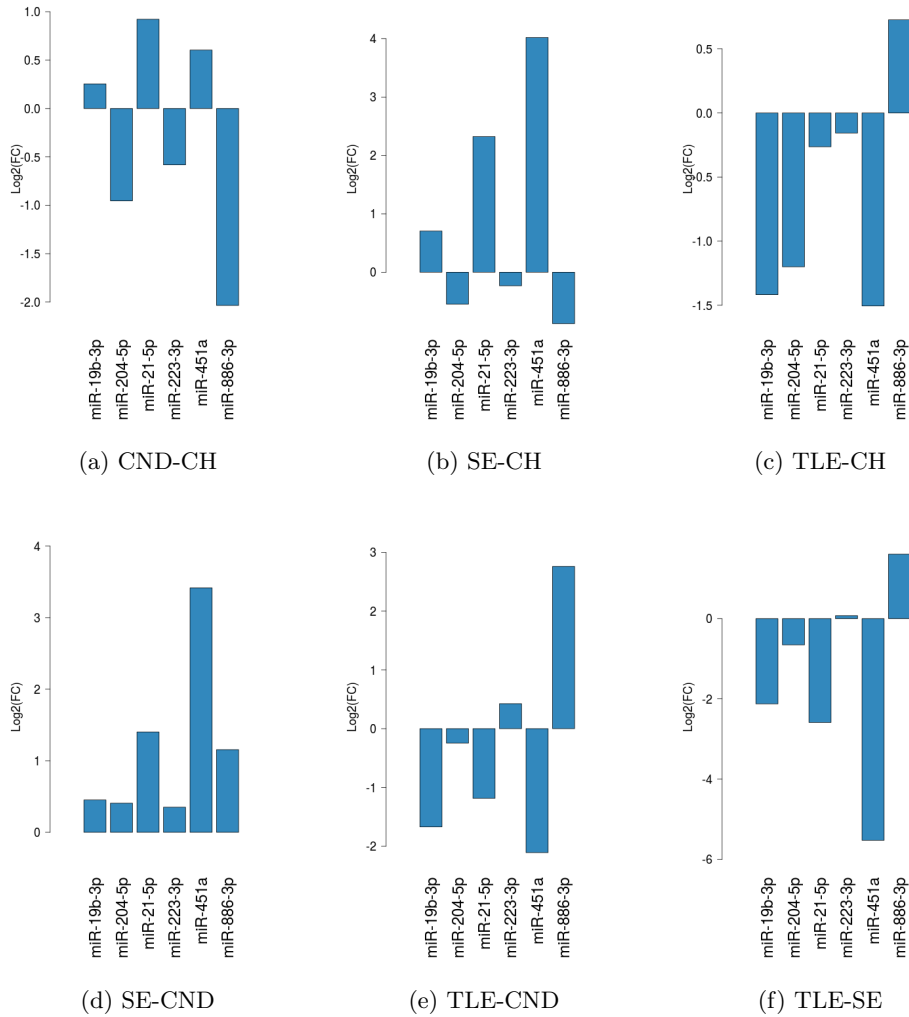

Figure S1: **Validation of microRNA.** Barplots showing the fold change (FC) in the first indicated group when compared to the second (i.e. TLE-CH is the FC in TLE compared to CH) following Taqman individual microRNA assays of miR-19b-3p, miR-21-5p, miR-204-5p, miR-223-3p, miR-451a and miR-886-3p for each of the four groups: CH ( $N = 25$ ), CND ( $N = 25$ ), SE ( $N = 16$ ) and TLE ( $N = 14$ ). The fold change is calculated as  $FC = 2^{-\Delta\Delta Ct}$ , where  $\Delta\Delta Ct = Ct_{miRNA} - Ct_{miR-24}$ .

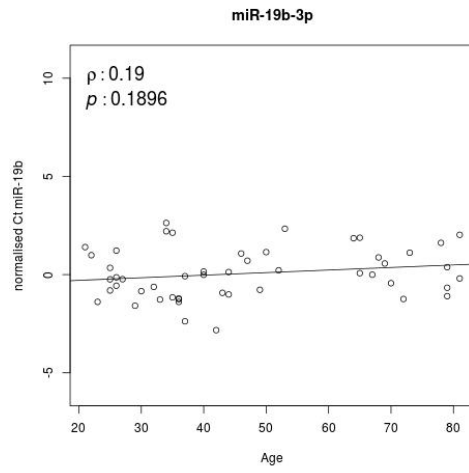

(a) miR-19b-3p

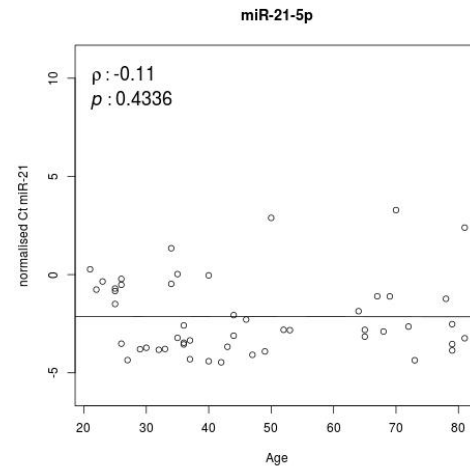

(b) miR-21-5p

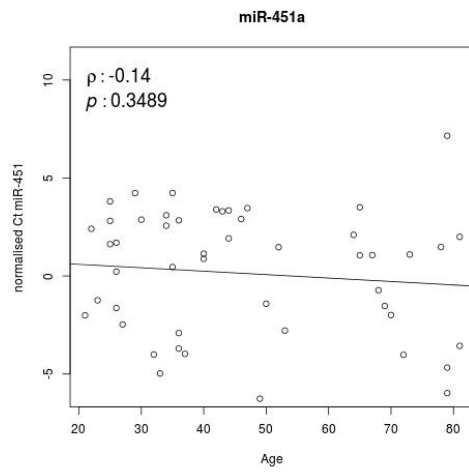

(c) miR-451a

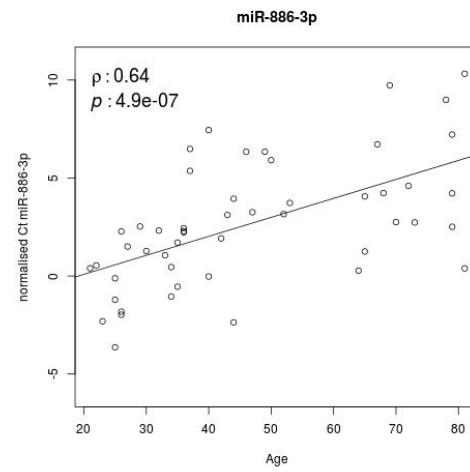

(d) miR-886-3p

Figure S2: Correlation between normalised Ct of microRNA in CSF and patient age in controls.

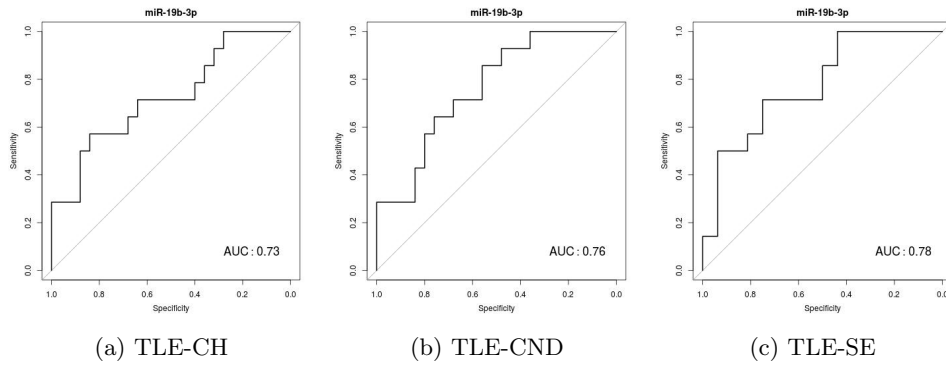

Figure S3: ROC analysis for miR-19b-3p in (a) TLE versus CH (b) TLE versus CND (c) TLE versus SE.

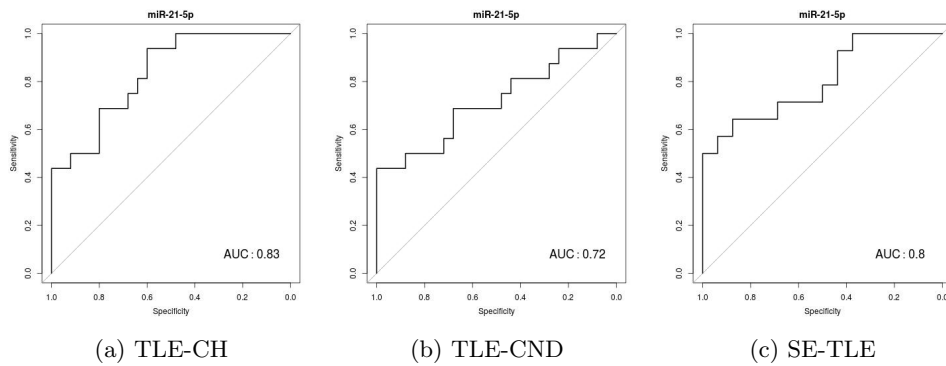

Figure S4: ROC analysis for miR-21-5p in (a) SE versus CH (b) SE versus CND (c) SE versus TLE.

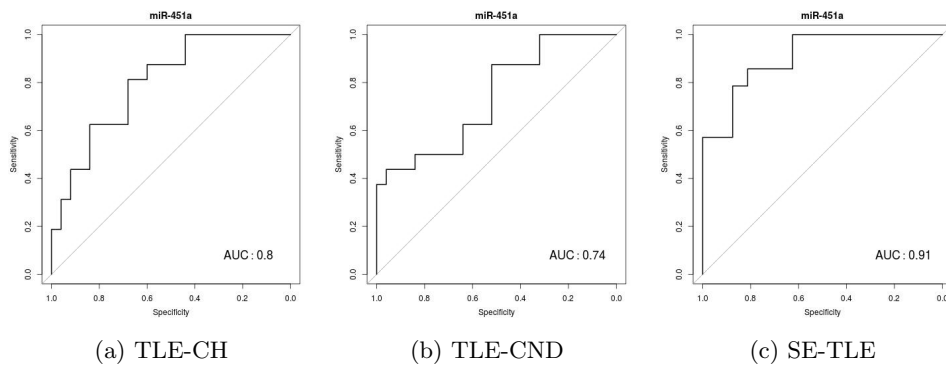

Figure S5: ROC analysis for miR-451a in (a) SE versus CH (b) SE versus CND (c) SE versus TLE.

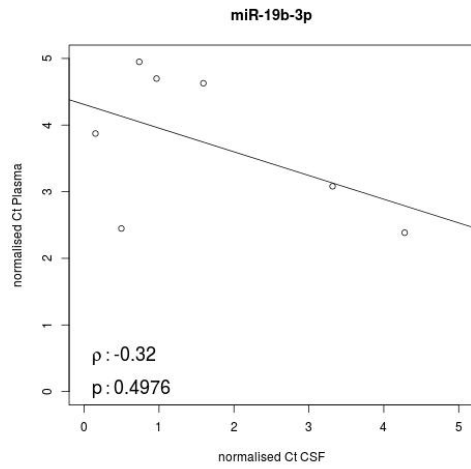

(a) miR-19b-3p

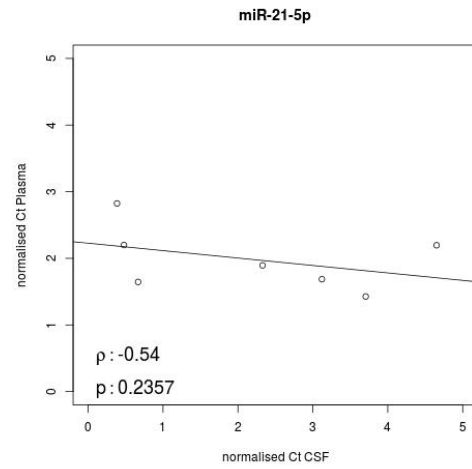

(b) miR-21-5p

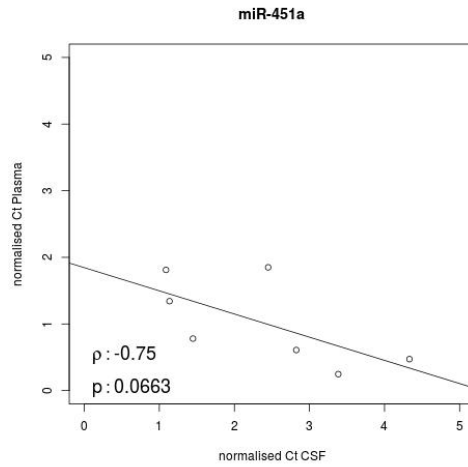

(c) miR-451a

Figure S6: Correlation of normalised Ct between CSF and plasma for (a) miR-19b-3p, (b) miR-21-5p and (c) miR-451a.

### Supplementary Tables S1-3

Table S1: Demographics and clinical data for TLE, SE, CND and CH samples.

| Control-Chronic Headache      |     |                     |            |
|-------------------------------|-----|---------------------|------------|
| Sex                           | Age | Diagnosis           | Experiment |
| F                             | 25  | chronic headache    | OA, P, A/E |
| F                             | 25  | chronic headache    | OA, P, A/E |
| F                             | 26  | chronic headache    | OA, P, A/E |
| F                             | 32  | chronic headache    | P          |
| F                             | 35  | chronic headache    | P          |
| F                             | 36  | chronic headache    | P          |
| F                             | 37  | chronic headache    | P          |
| F                             | 40  | chronic headache    | OA, P      |
| F                             | 40  | chronic headache    | P, A/E     |
| F                             | 43  | chronic headache    | OA, A/E    |
| F                             | 44  | chronic headache    | OA, P      |
| F                             | 44  | chronic headache    | P, A/E     |
| F                             | 46  | chronic headache    | P          |
| F                             | 47  | chronic headache    | P, A/E     |
| F                             | 48  | chronic headache    | OA         |
| F                             | 49  | chronic headache    | P          |
| F                             | 50  | chronic headache    | P          |
| F                             | 52  | chronic headache    | P          |
| M                             | 21  | chronic headache    | OA,P, A/E  |
| M                             | 22  | chronic headache    | P          |
| M                             | 23  | chronic headache    | OA, P, A/E |
| M                             | 25  | chronic headache    | OA, P, A/E |
| M                             | 26  | chronic headache    | OA, P, A/E |
| M                             | 34  | chronic headache    | OA, P, A/E |
| M                             | 34  | chronic headache    | OA, P, A/E |
| M                             | 35  | chronic headache    | OA, P, A/E |
| M                             | 37  | chronic headache    | P          |
| M                             | 41  | chronic headache    | OA, A/E    |
| Control-Neurological Diseases |     |                     |            |
| Sex                           | Age | Diagnosis           | Experiment |
| F                             | 67  | Alzheimer's disease | P, A/E     |
| F                             | 70  | Alzheimer's disease | P, A/E     |
| F                             | 79  | Alzheimer's disease | P, A/E     |
| M                             | 65  | Alzheimer's disease | P, A/E     |
| M                             | 68  | Alzheimer's disease | P, A/E     |
| M                             | 69  | Alzheimer's disease | P, A/E     |
| M                             | 78  | Alzheimer's disease | P, A/E     |
| M                             | 79  | Alzheimer's disease | P, A/E     |
| M                             | 81  | Alzheimer's disease | P, A/E     |
| F                             | 26  | multiple sclerosis  | P          |
| F                             | 27  | multiple sclerosis  | P, A/E     |
| F                             | 29  | multiple sclerosis  | P, A/E     |
| F                             | 30  | multiple sclerosis  | P, A/E     |
| F                             | 33  | multiple sclerosis  | P, A/E     |
| F                             | 36  | multiple sclerosis  | P, A/E     |
| F                             | 36  | multiple sclerosis  | P, A/E     |
| F                             | 42  | multiple sclerosis  | P, A/E     |
| M                             | 43  | multiple sclerosis  | P, A/E     |
| M                             | 81  | multiple sclerosis  | P, A/E     |



| F   | 53  | metastatic brain tumour<br>(breast cancer)             | P                                       |            |
|-----|-----|--------------------------------------------------------|-----------------------------------------|------------|
| F   | 64  | undefined gait disorder                                | P                                       |            |
| F   | 65  | sinus vein thrombosis                                  | P                                       |            |
| M   | 72  | choroidal melanoma<br>(with possible brain metastasis) | P                                       |            |
| M   | 73  | motor neuron disease                                   | P                                       |            |
| M   | 79  | right hypoglossal paresis                              | P                                       |            |
| TLE |     |                                                        |                                         |            |
| Sex | Age | Diagnosis                                              | Experiment                              |            |
| F   | 40  | TLE right                                              | OA, P, A/E                              |            |
| F   | 40  | TLE+HS                                                 | OA, A/E                                 |            |
| F   | 42  | focal                                                  | OA, P, A/E                              |            |
| F   | 45  | TLE                                                    | OA, P, A/E                              |            |
| F   | 55  | TLE                                                    | OA, P, A/E                              |            |
| F   | 56  | multifocal epilepsy                                    | OA, P, A/E                              |            |
| M   | 18  | TLE right                                              | OA, P, A/E                              |            |
| M   | 20  | TLE                                                    | OA, P, A/E                              |            |
| M   | 23  | TLE                                                    | OA, P, A/E                              |            |
| M   | 27  | TLE                                                    | OA, P, A/E                              |            |
| M   | 34  | multifocal epilepsy                                    | OA, P, A/E                              |            |
| M   | 35  | TLE                                                    | OA, P, A/E                              |            |
| M   | 48  | TLE                                                    | OA, P, A/E                              |            |
| M   | 57  | TLE                                                    | OA, P, A/E                              |            |
| M   | 60  | TLE left                                               | OA, P, A/E                              |            |
| SE  |     |                                                        |                                         |            |
| Sex | Age | Semiology                                              | Aetiology                               | Experiment |
| F   | 58  | FSE                                                    | encephalopathy of unknown origin        | OA, P, A/E |
| F   | 59  | FSE                                                    | undetermined                            | OA, P, A/E |
| F   | 76  | FSE                                                    | post-traumatic subarachnoid haemorrhage | OA, P, A/E |
| F   | 78  | FSE                                                    | brain tumour resection in 1990          | P          |
| F   | 81  | FSE                                                    | undetermined                            | P          |
| F   | 85  | FSE                                                    | left temporal lobe tumour               | OA, P, A/E |
| F   | 53  | NCSE                                                   | undetermined                            | P          |
| F   | 74  | NCSE                                                   | undetermined                            | OA, P, A/E |
| M   | 60  | FSE                                                    | alcohol abuse/hypoglycaemia IDDM        | OA, P, A/E |
| M   | 61  | FSE                                                    | aneurysmal bleeding                     | OA, P, A/E |
| M   | 77  | FSE                                                    | immediate SE after stroke               | OA, P, A/E |
| M   | 91  | FSE                                                    | apoplexy                                | OA, P, A/E |
| M   | 67  | GTC                                                    | HIV-encephalitis/schizophrenia          | OA, P, A/E |
| M   | 78  | GTC                                                    | lung tumour with brain metastases       | OA, A/E    |
| M   | 83  | GTC                                                    | dementia                                | OA, P, A/E |
| M   | 53  | NCSE                                                   | multiple sclerosis                      | OA, P, A/E |
| M   | 63  | NCSE                                                   | alcohol withdrawal                      | OA, P, A/E |
| M   | 88  | NCSE                                                   | post-stroke                             | OA, P, A/E |

Key: M = Male; F = Female; FSE = Focal SE; GTC = generalized tonic clonic; NCSE = non convulsive SE; insulin dependent diabetes mellitus (IDDM); DD= differential diagnosis; OA = samples used for profiling; P = samples used in RT-qPCR validation; A/E = samples used for Ago/Exo analysis.

Table S2: Validated targets for miR-21-5p, miR-19b-3p and miR-451a from miR-TarBase (Chou *et al.*, 2016).

| miR-21-5p | miR-21-5p | miR-19b-3p | miR-451a |
|-----------|-----------|------------|----------|
| AKT2      | NFIB      | ARID4B     | ABCB1    |
| ANKRD46   | NTF3      | ATXN1      | AKT1     |
| ANP32A    | PCBP1     | BACE1      | BCL2     |
| APAF1     | PDCD4     | BCL2L11    | CAB39    |
| BASP1     | PELI1     | BMPR2      | CPNE3    |
| BCL2      | PIAS3     | CREB1      | DCBLD2   |
| BCL6      | PLAT      | CUL5       | FRZB     |
| BMPR2     | PLOD3     | CYP19A1    | IKBKB    |
| BTG2      | PPARA     | DNMT1      | IL6R     |
| CCL20     | PPIF      | ESR1       | MIF      |
| CCR1      | PTEN      | GCM1       | MMP2     |
| CDC25A    | PTX3      | HIPK1      | MMP9     |
| CDK2AP1   | RASA1     | HIPK3      | MYC      |
| CLU       | RASGRP1   | KAT2B      | OSR1     |
| COL4A1    | RECK      | MXD1       | PKD1     |
| CXCL10    | REST      | MYCN       | RAB14    |
| DAXX      | RFFL      | MYLIP      | RAB5A    |
| DERL1     | RHO       | NCOA3      | ROR2     |
| DOCK4     | RHOB      | PPP2R5E    | TMED7    |
| DOCK5     | RMND5A    | PRKAA1     |          |
| DOCK7     | RPS7      | PTEN       |          |
| DUSP10    | RTN4      | SMAD4      |          |
| E2F1      | SASH1     | SOCS1      |          |
| E2F2      | SATB1     | TGFB1      |          |
| EGFR      | SECISBP2L | TGFBR2     |          |
| EIF4A2    | SERPINB5  | TLR2       |          |
| ELAVL4    | SERPINI1  | TP53       |          |
| ERBB2     | SETD2     |            |          |
| FASLG     | SIRT2     |            |          |
| FMOD      | SMAD7     |            |          |
| GAS5      | SMARCA4   |            |          |
| GDF5      | SMN1      |            |          |
| HIPK3     | SOD3      |            |          |
| HNRNPK    | SOX2      |            |          |
| HPGD      | SOX5      |            |          |
| ICAM1     | SP1       |            |          |
| IGF1R     | SPRY2     |            |          |
| IL12A     | STAT3     |            |          |
| IL1B      | TCF21     |            |          |
| IRAK1     | TGFB1     |            |          |
| ISCU      | TGFBR2    |            |          |
| JAG1      | TGFBR3    |            |          |
| JMY       | TGIF1     |            |          |
| LRRFIP1   | TIAM1     |            |          |
| MAP2K3    | TIMP3     |            |          |
| MARCKS    | TM9SF3    |            |          |
| MEF2C     | TNFAIP3   |            |          |
| MMP2      | TNFRSF10B |            |          |
| MMP9      | TOPORS    |            |          |
| MSH2      | TOR1AIP2  |            |          |
| MSH6      | TP53BP2   |            |          |
| MTAP      | TP63      |            |          |
| MYC       | TPM1      |            |          |
| MYD88     | VEGFA     |            |          |
| NCAPG     | VHL       |            |          |
| NCOA3     | WWP1      |            |          |
| NFIA      | YOD1      |            |          |

Table S3: Validated targets for miR-19b-3p, miR-21-5p and miR-451a from miR-TarBase with genes in the CARPEDB (<http://carpedb.ua.edu/search.cfm>) and epiGAD (Tan and Berkovic, 2010) databases.

| Epilepsy gene database | Gene        |
|------------------------|-------------|
| miR-19b-3p             |             |
| egad                   | ARC         |
| egad                   | MTRR        |
| carpedb                | NF1         |
| egad                   | NR3C1       |
| carpedb                | SLC6A8      |
| egad                   | SLC9A1/NHE1 |
| carpedb                | SLC9A6      |
| carpedb                | TCF4        |
| miR-21-5p              |             |
| carpedb                | ADNP        |
| carpedb                | EIF2S1      |
| carpedb                | EPM2A       |
| carpedb                | FMR1        |
| carpedb, egad          | IL1B        |
| carpedb                | PLAT        |
| carpedb                | PLD1        |
| carpedb                | ZNF354A     |
| miR-451a               |             |
| carpedb, egad          | ABCB1       |

## References

- Chou CH, Chang NW, Shrestha S, Hsu SD, Lin YL, Lee WH, *et al.* miRTarBase 2016: updates to the experimentally validated miRNA-target interactions database. *Nucleic acids research* 2016; 44: D239–D247.
- Jimenez-Mateos EM, Engel T, Merino-Serrais P, McKiernan RC, Tanaka K, Mouri G, *et al.* Silencing microRNA-134 produces neuroprotective and prolonged seizure-suppressive effects. *Nature Medicine* 2012; 18: 1087–1094.
- Lobb RJ, Becker M, Wen SW, Wong CS, Wiegmans AP, Leimgruber A, *et al.* Optimized exosome isolation protocol for cell culture supernatant and human plasma. *Journal of Extracellular Vesicles* 2015; 4: 27031–27031.
- Mitchell PS, Parkin RK, Kroh EM, Fritz BR, Wyman SK, Pogosova-Agadjanyan EL, *et al.* Circulating microRNAs as stable blood-based markers for cancer detection. *Proceedings of the National Academy of Sciences* 2008; 105: 10513–10518.
- Mooney C, Raoof R, El-Naggar H, Sanz-Rodriguez A, Jimenez-Mateos EM, and Henshall DC. High Throughput qPCR Expression Profiling of Circulating MicroRNAs Reveals Minimal Sex-and Sample Timing-Related Variation in Plasma of Healthy Volunteers. *PloS one* 2015; 10: e0145316.
- Tan NC and Berkovic SF. The Epilepsy Genetic Association Database (epiGAD): analysis of 165 genetic association studies, 1996–2008. *Epilepsia* 2010; 51: 686–689.
